# Supplementary material
Source: HighWire-hosted journal article supplement (https://bmjopen.bmj.com/content/11/4/e046005)
Supplement: inline-supplementary-material-2 [file inline-supplementary-material-2.pdf]

## ADDITIONAL FILE 2 : SEARCH STRATEGY

## MEDLINE EBSCO

| No. | Search Terms                                                                                                                                                                                                                                               |
|-----|------------------------------------------------------------------------------------------------------------------------------------------------------------------------------------------------------------------------------------------------------------|
| 1.  | TI ( pregnan* OR gestation* OR "expected mother*" OR "expected woman" OR "expected women" OR natal OR antenatal OR birth* ) OR AB ( pregnan* OR gestation* OR "expected mother*" OR "expected woman" OR "expected women" OR natal OR antenatal OR birth* ) |
| 2.  | TI ( "placenta* growth factor*" OR plgf ) OR AB ( "placenta* growth factor*" OR plgf )                                                                                                                                                                     |
| 3.  | (MH "Pregnancy+")                                                                                                                                                                                                                                          |
| 4.  | (MH "Placenta Growth Factor")                                                                                                                                                                                                                              |
| 5.  | (MH "Urine")                                                                                                                                                                                                                                               |
| 6.  | TI urin* OR AB urin*                                                                                                                                                                                                                                       |
| 7.  | 1 or 3                                                                                                                                                                                                                                                     |
| 8.  | 2 or 4                                                                                                                                                                                                                                                     |
| 9.  | 5 or 6                                                                                                                                                                                                                                                     |
| 10. | 7 and 8 and 9                                                                                                                                                                                                                                              |

## SCOPUS

( TITLE-ABS-KEY ( pregnan\* OR gestation\* OR "expected mother\*" OR "expected woman" OR "expected women" OR natal OR antenatal OR birth\* ) AND TITLE-ABS-KEY ( "placenta\* growth factor\*" OR plgf ) AND TITLE-ABS-KEY ( urin\* ) )
